# Supplementary material for: Intestinal microbiome in children with severe and complicated acute viral gastroenteritis
Source: PubMed Central journal article supplement (PMC5387401; doi:10.1038/srep46130), 2017-04-11
Supplement: srep46130-s1.pdf [file srep46130-s1.pdf]

**Supplemental informations for**

**Intestinal microbiome in children with severe and complicated acute viral**

**Gastroenteritis**

Shih-Yen Chen<sup>1</sup>, Chi-Neu Tsai<sup>2</sup>, Yun-Shien Lee<sup>3</sup>, Chun-Yuan Lin<sup>4</sup>, Kuan-Yeh

Huang<sup>5</sup>, Hsun-Ching Chao<sup>1</sup>, Ming-Wei Lai<sup>1</sup> & Cheng-Hsun Chiu<sup>2,5,\*</sup>

<sup>1</sup>Division of Pediatric Gastroenterology, Chang Gung Children's Hospital, Chang Gung University College of Medicine, Taoyuan, Taiwan.

<sup>2</sup>Graduate Institute of Clinical Medical Sciences, Chang Gung University College of Medicine, Taoyuan, Taiwan

<sup>3</sup>Department of Biotechnology, Min-Chuan University, Taoyuan, Taiwan

<sup>4</sup>Department of Computer Science and Information Engineering, Chang Gung University College of Engineering, Taoyuan, Taiwan

<sup>5</sup>Molecular Infectious Disease Research Center, Chang Gung Memorial Hospital, Chang Gung University College of Medicine, Taoyuan, Taiwan.

sFig. 1A

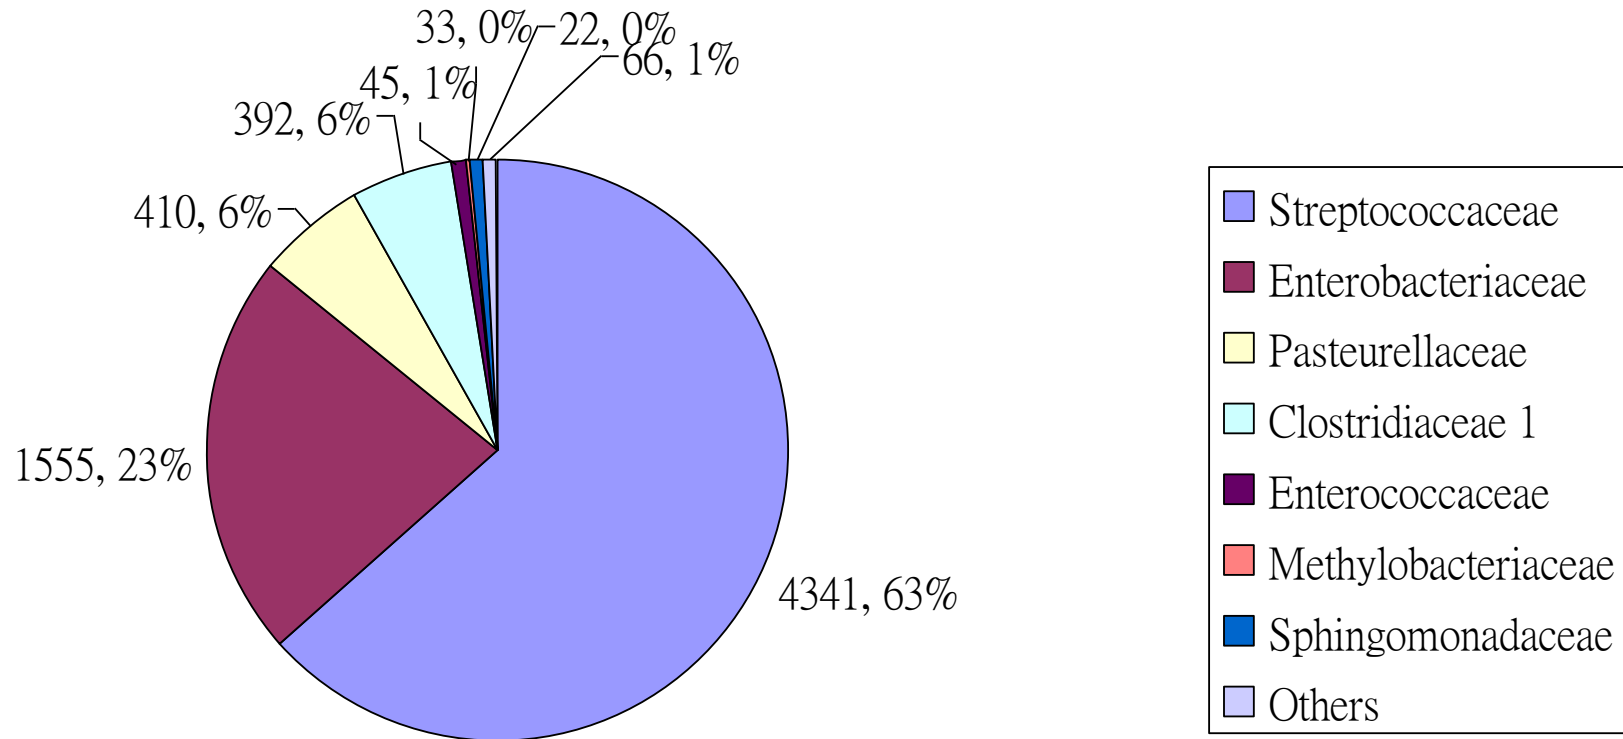

Intestinal microbiota in a 37-day-old neonate with noroviral AGE and necrotizing enterocolitis.

sFig. 1B

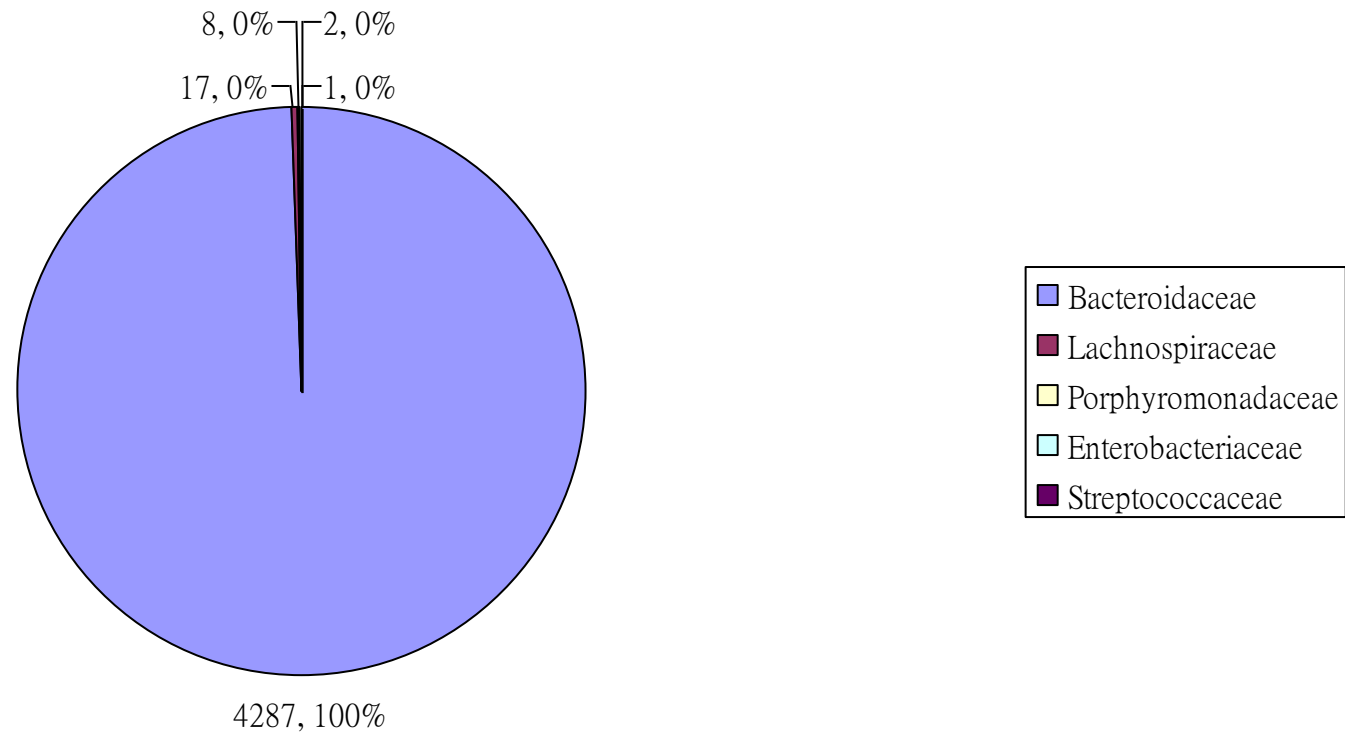

Intestinal microbiota in a 9-month-old male children with rotavirus AGE and convulsion.

sFig. 1C

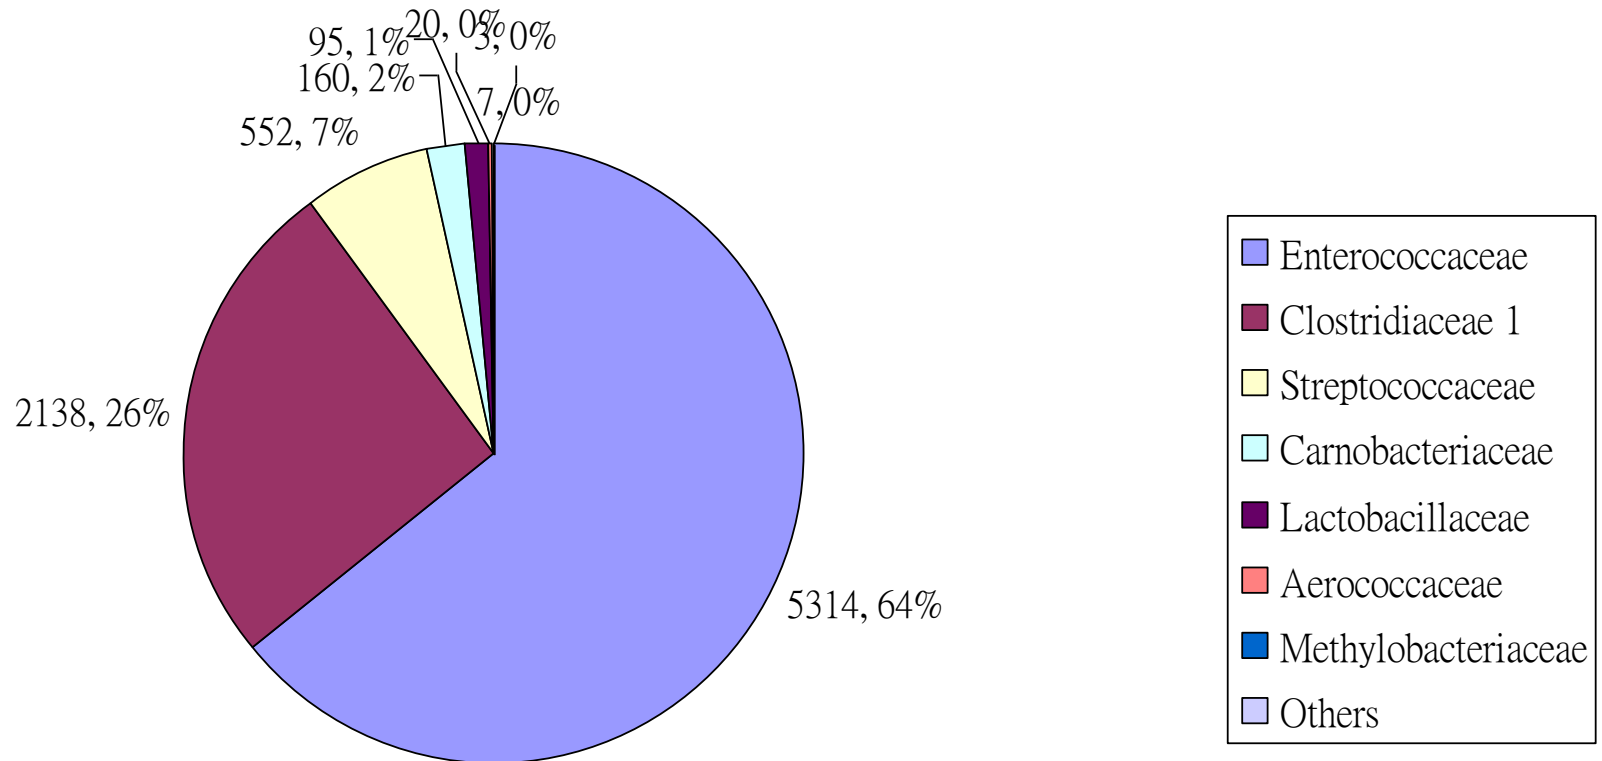

Intestinal microbiota in an 11-month-old male children with noroviral AGE and acute renal failure.
